# Supplementary material for: Genomically Complex Human Angiosarcoma and Canine Hemangiosarcoma Establish Convergent Angiogenic Transcriptional Programs Driven by Novel Gene Fusions
Source: Oxford University Press journal article supplement (doi:10.1158/1541-7786.mcr-20-0937), 2021-03-01
Supplement: 15417786mcr200937-sup-254353_2_supp_6849992_qmzv9t.xlsx [file 15417786mcr200937-sup-254353_2_supp_6849992_qmzv9t.xlsx]

## Sheet: S1
Supplementary Table S1. Demographic and pathological features of human patients with angiosarcoma
Patient ID	Age	Sex	Tissue Speciemn	Pathological Status	Metastasis	Tumor content
Patient 1	69	Female	Omentum	Angiosarcoma	Metastasized	0.9
Patient 2	45	Male	Lung	Angiosarcoma	Metastasized	0.4
			Submandibular gland	Non-malignant	-	-
Patient 3	39	Female	Perihepatic tissue	Angiosarcoma	Metastasized	0.1
Patient 4	62	Male	Heart	Angiosarcoma	-	N/A
Patient 5	64	Female	Breast	Angiosarcoma	-	0.95
			Skin	Non-malignant	-	-
Patient 6	Unknown	Unknown	Adrenal gland	Angiosarcoma	-	N/A
Patient 7	40	Female	Ovary	Angiosarcoma	-	1
Patient 8	73	Female	Left chest wall	Angiosarcoma	-	0.3
Patient 9	47	Male	Lung	Angiosarcoma	-	0.5
Patient 10	65	Female	Breast	Angiosarcoma	-	0.9
Patient 11	85	Male	Liver	Angiosarcoma	-	0.5
Patient 12	69	Female	Parotid gland	Angiosarcoma	-	0.2
Patient 13	73	Male	Soft tissue	Angiosarcoma	-	0.1
Patient 14	80	Female	Breast adipose tissue	Non-malignant	-	-
Patient 15	74	Male	Thigh muscle	Non-malignant	-	-
Patient 16	33	Male	Spleen	Non-malignant	-	-
Patient 17	47	Male	Lung	Non-malignant	-	-

## Sheet: S2
Supplementary Table S2. Demographic and pathological features of dogs with HSA
Sample Name	Breed	Age at Dx (Years)	Sex	Neuter Status	Tumor Location	Survival Time (Days)
CHAD-B7	Border Collie (mix)	6	Male	Neutered	Heart	0
CHAD-G3	Golden Retriever	10	Male	Unknown	Spleen	Unknown
CHAD-G4	Golden Retriever	12	Male	Unknown	Spleen	Unknown
CHAD-G6	Golden Retriever	12	Female	Spayed	Spleen	84
CHAD-G8	Golden Retriever	12	Male	Unknown	Spleen	Unknown
CHAD-P9	Portuguese Water Dog	9	Male	Unknown	Liver met	Unknown
DHSA-0501	Bernese Mountain Dog	5.9	Female	Unknown	Heart	0
DHSA-0502	Golden Retriever	10.3	Female	Intact	Spleen	80
DHSA-0601	Golden Retriever	11.5	Female	Unknown	Spleen	9
DHSA-0602	Golden Retriever	6	Male	Neutered	Spleen	0
DHSA-0603	Portuguese Water Dog	11.1	Female	Spayed	Heart	Unknown
DHSA-0604	Keeshond	12	Male	Neutered	Spleen	3
DHSA-0605	Golden Retriever	0.7	Female	Intact	Unknwon	Unknown
DHSA-0606	German Shepherd Dog	10.8	Male	Neutered	Spleen	Unknown
DHSA-0701	Bichon Frise	10.7	Female	Spayed	Cutenaous	Unknown
DHSA-0702	Biullmastiff	8.5	Male	Neutered	Spleen	6
DHSA-0803	Golden Retriever	8.8	Male	Neutered	Heart	158
DHSA-0804	Golden Retriever	6.7	Male	Neutered	Spleen and omentum	64
DHSA-0805	Golden Retriever	9.2	Female	Intact	Spleen	18
DHSA-0901	Golden Retriever	10.3	Female	Spayed	Spleen	Unknown
DHSA-0903	Golden Retriever	10.1	Male	Intact	Spleen	59
DHSA-0904	Golden Retriever	9.1	Male	Intact	Heart and liver	0
DHSA-0905	Golden Retriever	8.4	Female	Intact	Heart	0
DHSA-0906	Golden Retriever	3	Male	Intact	Spleen	0
DHSA-0907	Portuguese Water Dog	10	Female	Unknown	Liver	20
DHSA-0908	Boxer	8.7	Male	Intact	Abdominal mass	0
DHSA-0909	Golden Retriever	10.2	Female	Spayed	Spleen, with mets to pericardial sac, lung, and liver	0
DHSA-0910	Keeshond	12.8	Male	Neutered	Liver	0
DHSA-1001	Golden Retriever	12	Male	Neutered	Spleen	1
DHSA-1002_Li	Golden Retriever	12	Male	Neutered	Liver	0
DHSA-1002_Sp					Spleen
DHSA-1006	German Shepherd Dog	11	Female	Spayed	Spleen	731
DHSA-1007	Gordon Setter	9.5	Female	Spayed	Presumed spleen, with mets to liver	0
DHSA-1008	Golden Retriever	9.6	Female	Spayed	Liver	7
DHSA-1009	German Shepherd Dog	11	Female	Spayed	Spleen	387
DHSA-1010	Golden Retriever	12.6	Male	Intact	Spleen	Unknown
DHSA-1011	Boxer	10.1	Female	Spayed	Spleen	72
DHSA-1013	Labrador Retriever	13.5	Male	Neutered	Spleen	164
DHSA-1014	Golden Retriever	9.4	Female	Spayed	Spleen	Unknown
DHSA-1015	Wolfdog (mix)	10.9	Female	Spayed	Liver	0
DHSA-1016	Golden Retriever	10.9	Male	Intact	heart (R. auricle) + lung	0
DHSA-1017	Briard	10.1	Female	Intact	Spleen	9
DHSA-1101	Golden Retriever	8.1	Female	Intact	Heart	185
DHSA-1102	Golden Retriever	9.1	Male	Neutered	Heart and spleen	25
DHSA-1103_Li	Golden Retriever	13.6	Female	Spayed	Liver	65
DHSA-1103_Sp	Golden Retriever				Spleen
DHSA-1104	Golden Retriever	7.3	Male	Neutered	Unknown; received kidney	39
DHSA-1106	Golden Retriever	9.4	Female	Spayed	Spleen	378
DHSA-1107	Golden Retriever	10.9	Male	Neutered	Heart	0
DHSA-1108	Labrador Retriever	10	Male	Neutered	Heart	8
DHSA-1109	Golden Retriever	8.6	Male	Neutered	Spleen and heart	67
DHSA-1110	Golden Retriever	11.3	Female	Spayed	Unknown	12
DHSA-1111	Golden Retriever	12.3	Female	Spayed	Spleen	Unknown
DHSA-1112	Portuguese Water Dog	11.2	Female	Unknown	Spleen	5
DHSA-1113	Saluki	11.2	Male	Intact	Heart	35
DHSA-1114	Golden Retriever	8.4	Male	Neutered	Spleen	60
DHSA-1202	Golden Retriever	11.3	Female	Spayed	Spleen	28
DHSA-1203	Mix (Laborado Retriever X Siberian Husky)	9	Female	Spayed	Bladder	30
DHSA-1204	Golden Retriever	8	Male	Neutered	Spleen (mets)	0
DHSA-1301	Portuguese Water Dog	8.4	Female	Spayed	Spleen, liver	2
DHSA-1302	Golden Retriever	7.9	Female	Spayed	Spleen	14
DHSA-1304	Labrador Retriever (mix)	10.5	Female	Spayed	Liver	70
DHSA-1306	Golden Retriever	11.4	Female	Spayed	Heart	17
DHSA-1407	Golden Retriever	7.9	Female	Spayed	Heart	14
DHSA-1408	Portuguese Water Dog	11.1	Female	Spayed	Spleen	39
DHSA-1409	German Shepherd Dog	9.1	Male	Neutered	Spleen	119
DHSA-1415	Golden Retriever	8.9	Female	Spayed	Heart	0
DHSA-1416	Mix	10.2	Female	Spayed	Spleen	253
DHSA-1423	Laborado Retriever (mix)	10	Male	Neutered	Spleen	Unknown
DHSA-1426	Golden Retriever	10	Male	Neutered	Spleen	Unknown
DHSA-1434	Parsons Russell Terrier	13	Male	Neutered	Spleen	22
DHSA-1503	Golden Retriever	11	Female	Spayed	Spleen	63
DHSA-1504	Golden Retriever	10	Male	Neutered	Spleen	47
DHSA-1512	German Shepherd Dog	4	Male	Neutered	Spleen	535
DHSA-1513	German Shepherd Dog	10	Male	Neutered	Spleen	185
DHSA-1519	American Stafforsdshire Terrier	12	Female	Spayed	Spleen	98

## Sheet: S3
Supplementary Table S3. Primary antibodies for immunohistochemical evaluation
Primary antibody	Company	Catalog #	Source
p53	Thermo Fisher	MA5-15244	Mouse monoclonal
Phospho-p53 (Ser 15)	Abcam	ab38497	Rabbit Polyclonal
Phospho-p53 (Ser 20)	Genetex	GTX78985	Rabbit Polyclonal
AKT	Cell Signaling Technology	#9272S	Rabbit Polyclonal
Phospho-AKT (Thr 308)	Cell Signaling Technology	#9275S	Rabbit Polyclonal
mTOR	Abcam	ab2732	Rabbit Polyclonal
Phospho-mTOR (Ser 2448)	Cell Signaling Technology	#2976S	Rabbit monoclonal (clone 49F9)

## Sheet: S4
Supplementary Table S4. Gene ontology and biological functions of fusion partner genes in human angiosarcomas
Sample ID	Gene Name		Putative fusion gene	Gene Ontology Database Annotations
				GO Molecular funcion		GO Biological process
	Gene 1	Gene 2		Gene 1	Gene 2	Gene 1	Gene 2
Patient 3	VKORC1L1	STEAP1B	VKORC1L1-STEAP1B	quinone binding, vitamin-K-epoxide reductase (warfarin-sensitive) activity	unknown	vitamin K metabolic process, peptidyl-glutamic acid carboxylation, cellular response to oxidative stress, oxidation-reduction process	unknown
	PPP1R13B	ATP5MPL	PPP1R13B-ATP5MPL	p53 binding, protein binding, transcription factor binding	molecular_function	intrinsic apoptotic signaling pathway by p53 class mediator, apoptotic process, negative regulation of cell cycle, positive regulation of protein insertion into mitochondrial membrane involved in apoptotic signaling pathway, regulation of signal transduction by p53 class mediator, regulation of apoptotic process, positive regulation of neuron death	biological_process
Patient 7	SMURF1	TMEM139	SMURF1-TMEM139	ubiquitin-protein transferase activity, ubiquitin protein ligase activity, protein binding, activin binding, R-SMAD binding, I-SMAD binding, phospholipid binding	protein binding	protein localization to cell surface, positive regulation of ubiquitin-dependent protein catabolic process, positive regulation of dendrite extension, protein polyubiquitination, transforming growth factor beta receptor signaling pathway, positive regulation of protein catabolic process, engulfment of target by autophagosome, ectoderm development, protein export from nucleus, substrate localizati…	unknown
	AGO2	TRAPPC9	AGO2-TRAPPC9	miRNA binding, endoribonuclease activity, cleaving miRNA-paired mRNA, protein C-terminus binding, siRNA binding, RNA polymerase II complex binding, core promoter binding, endoribonuclease activity, translation initiation factor activity, RNA 7-methylguanosine cap binding, RNA binding, protein binding, endoribonuclease activity, cleaving siRNA-paired mRNA, double-stranded RNA binding, metal ion bi…	protein binding	negative regulation of translational initiation, positive regulation of nuclear-transcribed mRNA catabolic process, deadenylation-dependent decay, positive regulation of trophoblast cell migration, post-embryonic development, siRNA loading onto RISC involved in RNA interference, miRNA loading onto RISC involved in gene silencing by miRNA, positive regulation of transcription by RNA polymerase II,…	neuron differentiation, cerebral cortex development, positive regulation of NF-kappaB transcription factor activity, COPII vesicle coating
Patient 9	PEMT	ANKRD6	PEMT-ANKRD6	phosphatidylethanolamine binding, phosphatidyl-N-dimethylethanolamine N-methyltransferase activity, phosphatidylethanolamine N-methyltransferase activity, phosphatidyl-N-methylethanolamine N-methyltransferase activity	unknown	response to ethanol, S-adenosylhomocysteine metabolic process, negative regulation of cell population proliferation, blastocyst hatching, response to vitamin, response to amino acid, S-adenosylmethionine metabolic process, positive regulation of lipoprotein metabolic process, positive regulation of cold-induced thermogenesis, phosphatidylcholine biosynthetic process, sphingomyelin biosynthetic pr…	negative regulation of canonical Wnt signaling pathway, positive regulation of JNK cascade, positive regulation of Wnt signaling pathway, planar cell polarity pathway
	CPD	NSRP1	CPD-NSRP1	zinc ion binding, metallocarboxypeptidase activity, serine-type carboxypeptidase activity	RNA binding, protein binding, mRNA binding	peptide metabolic process, proteolysis, protein processing	RNA splicing, regulation of alternative mRNA splicing, via spliceosome, in utero embryonic development, mRNA processing, developmental process
Patient 10	SCLT1	NIPBL	SCLT1-NIPBL	sodium channel regulator activity, protein C-terminus binding, clathrin binding	protein binding, histone deacetylase binding, promoter-specific chromatin binding, protein C-terminus binding, chromo shadow domain binding, mediator complex binding, protein N-terminus binding, chromatin binding	clustering of voltage-gated sodium channels, cilium assembly, ciliary basal body-plasma membrane docking	mitotic chromosome condensation, positive regulation of histone deacetylation, external genitalia morphogenesis, gall bladder development, outflow tract morphogenesis, positive regulation of mitotic cohesin loading, cytokinesis, embryonic digestive tract morphogenesis, fat cell differentiation, uterus morphogenesis, positive regulation of multicellular organism growth, regulation of developmental…
Patient 11	TEX2	PECAM1	TEX2-PECAM1	lipid binding, molecular_function	protein binding, protein homodimerization activity	lipid transport, signal transduction, sphingolipid metabolic process	positive regulation of protein localization to cell-cell junction, endothelial cell-matrix adhesion, homophilic cell adhesion via plasma membrane adhesion molecules, positive regulation of tyrosine phosphorylation of STAT protein, endothelial cell migration, leukocyte cell-cell adhesion, platelet degranulation, wound healing, endothelial cell morphogenesis, angiogenesis, positive regulation of pe…
Patient 12	ATP8A2	FLT1	ATP8A2-FLT1	magnesium ion binding, aminophospholipid flippase activity, ATP binding, ATPase-coupled intramembrane lipid transporter activity	ATP binding, placental growth factor-activated receptor activity, protein tyrosine kinase activity, growth factor binding, protein binding, transmembrane receptor protein tyrosine kinase activity, vascular endothelial growth factor-activated receptor activity, vascular endothelial growth factor binding, VEGF-A-activated receptor activity, VEGF-B-activated receptor activity	detection of light stimulus involved in visual perception, neurofilament cytoskeleton organization, negative regulation of cell population proliferation, involuntary skeletal muscle contraction, neuron development, aging, skin development, positive regulation of multicellular organism growth, eating behavior, neuromuscular process controlling posture, phospholipid translocation, axonogenesis, inn…	positive regulation of MAP kinase activity, negative regulation of vascular endothelial cell proliferation, peptidyl-tyrosine phosphorylation, positive regulation of phosphatidylinositol 3-kinase signaling, multicellular organism development, positive regulation of cell population proliferation, sprouting angiogenesis, protein autophosphorylation, blood vessel morphogenesis, protein phosphorylati…
Patient 13	IRF9	THTPA	IRF9-THTPA	DNA-binding transcription factor activity, protein binding, RNA polymerase II cis-regulatory region sequence-specific DNA binding, transcription regulatory region DNA binding, DNA-binding transcription factor activity, RNA polymerase II-specific	magnesium ion binding, thiamin-triphosphatase activity, hydrolase activity	interferon-gamma-mediated signaling pathway, regulation of transcription, DNA-templated, transcription by RNA polymerase II, defense response to virus, cell surface receptor signaling pathway, immune system process, regulation of transcription by RNA polymerase II, type I interferon signaling pathway	thiamine-containing compound metabolic process, generation of precursor metabolites and energy, thiamine metabolic process, dephosphorylation, thiamine diphosphate metabolic process

## Sheet: S5
Supplementary Table S5. Gene ontology and biological functions of fusion partner genes in canine HSAs
Sample ID	Gene Name		Putative fusion gene	Gene Ontology Database Annotations
				GO Molecular funcion		GO Biological process
	Gene 1	Gene 2		Gene 1	Gene 2	Gene 1	Gene 2
CHAD-B7	PREX2	LPCAT1	PREX2-LPCAT1	GTPase activator activity, Rac guanyl-nucleotide exchange factor activity	transferase activity, transferring acyl groups, 1-acylglycerophosphocholine O-acyltransferase activity, calcium ion binding, 1-alkenylglycerophosphocholine O-acyltransferase activity, 1-alkylglycerophosphocholine O-acyltransferase activity	regulation of Rho protein signal transduction, G-protein coupled receptor signaling pathway, phosphatidylinositol 3-kinase signaling, adult locomotory behavior, negative regulation of TOR signaling, negative regulation of protein kinase activity, positive regulation of GTPase activity, dendrite morphogenesis	phosphatidylcholine acyl-chain remodeling, retina development in camera-type eye, metabolic process, phospholipid biosynthetic process, positive regulation of protein catabolic process, surfactant homeostasis, negative regulation of phosphatidylcholine biosynthetic process
DHSA-1204	AP4E1	BAIAP2	AP4E1-BAIAP2	unknown	cadherin binding involved in cell-cell adhesion, proline-rich region binding, identical protein binding, cytoskeletal adaptor activity	vesicle-mediated transport, intracellular protein transport	regulation of cell shape, actin crosslink formation, plasma membrane organization, response to bacterium, regulation of actin cytoskeleton organization, insulin receptor signaling pathway, positive regulation of actin cytoskeleton reorganization, positive regulation of actin filament polymerization, regulation of synaptic plasticity, cell-cell adhesion, actin filament bundle assembly, dendrite de…
	NOL10	PTPRB	NOL10-PTPRB	RNA binding	protein tyrosine phosphatase activity	unknown	angiogenesis, peptidyl-tyrosine dephosphorylation
DHSA-0906	MYO16	PTK2	MYO16-PTK2	ATP binding, motor activity	ATP binding, protein tyrosine kinase activity, actin binding, non-membrane spanning protein tyrosine kinase activity, JUN kinase binding, SH2 domain binding, signal transducer activity, receptor binding	phosphatidylinositol 3-kinase signaling, neuron projection morphogenesis	regulation of cell shape, signal complex assembly, positive regulation of protein ubiquitination involved in ubiquitin-dependent protein catabolic process, peptidyl-tyrosine phosphorylation, positive regulation of phosphatidylinositol 3-kinase signaling, cytoskeleton organization, central nervous system neuron axonogenesis, epidermal growth factor receptor signaling pathway, negative regulation o…
	ATP9A	SNX5	ATP9A-SNX5	magnesium ion binding, ATP binding, phospholipid-translocating ATPase activity	dynactin binding, cadherin binding, phosphatidylinositol binding	retrograde vesicle-mediated transport, Golgi to ER, phospholipid translocation, endocytosis	vesicle organization, pinocytosis, intracellular protein transport, endocytosis, retrograde transport, endosome to Golgi
DHSA1101	GABRA3	FLT1	GABRA3-FLT1	GABA-A receptor activity, extracellular ligand-gated ion channel activity	ATP binding, placental growth factor-activated receptor activity, growth factor binding, VEGF-A-activated receptor activity, VEGF-B-activated receptor activity	ion transmembrane transport, chloride transport, gamma-aminobutyric acid signaling pathway	positive regulation of MAP kinase activity, peptidyl-tyrosine phosphorylation, positive regulation of phosphatidylinositol 3-kinase signaling, vascular endothelial growth factor receptor-1 signaling pathway, monocyte chemotaxis, positive regulation of vascular endothelial growth factor receptor signaling pathway, vascular endothelial growth factor signaling pathway, positive regulation of phospha…
DHSA1407	ANKH	ATG16L1	ANKH-ATG16L1	inorganic phosphate transmembrane transporter activity, phosphate ion transmembrane transporter activity, inorganic diphosphate transmembrane transporter activity	identical protein binding, GTPase binding	inorganic diphosphate transport, phosphate ion transmembrane transport, regulation of bone mineralization	autophagosome assembly, negative stranded viral RNA replication, protein localization to phagophore assembly site, protein lipidation involved in autophagosome assembly, xenophagy
DHSA1416	LAMB1	CBLB	LAMB1-CBLB	extracellular matrix structural constituent	phosphotyrosine residue binding, ubiquitin protein ligase activity, calcium ion binding, SH3 domain binding, signal transducer activity, receptor tyrosine kinase binding	neuronal-glial interaction involved in cerebral cortex radial glia guided migration, neuron projection development, substrate adhesion-dependent cell spreading, endodermal cell differentiation, odontogenesis, positive regulation of cell migration	negative regulation of epidermal growth factor-activated receptor activity, epidermal growth factor receptor signaling pathway, proteolysis, protein ubiquitination
DHSA1513	PIK3AP1	REV3L	PIK3AP1-REV3L	identical protein binding, phosphatidylinositol 3-kinase regulatory subunit binding	nucleotide binding, DNA binding, 3'-5' exonuclease activity, DNA-directed DNA polymerase activity	toll-like receptor 9 signaling pathway, positive regulation of phosphatidylinositol 3-kinase signaling, toll-like receptor 2 signaling pathway, toll-like receptor 7 signaling pathway, toll-like receptor 4 signaling pathway, regulation of inflammatory response	nucleic acid phosphodiester bond hydrolysis, error-prone translesion synthesis, translesion synthesis
	AKT3	XPNPEP1	AKT3-XPNPEP1	ATP binding, protein serine/threonine kinase activity	protein homodimerization activity, metal ion binding, metalloaminopeptidase activity, manganese ion binding	positive regulation of cell size, homeostasis of number of cells within a tissue, brain morphogenesis, peptidyl-serine phosphorylation, positive regulation of TOR signaling, intracellular signal transduction, mitochondrial genome maintenance	bradykinin catabolic process, proteolysis
DHSA-1015	MRPS35	CACNA1C	MRPS35-CACNA1C	RNA binding, structural constituent of ribosome	calmodulin binding, voltage-gated calcium channel activity involved in AV node cell action potential, high voltage-gated calcium channel activity, alpha-actinin binding, voltage-gated calcium channel activity	unknown	membrane depolarization during AV node cell action potential, calcium ion transmembrane transport via high voltage-gated calcium channel, immune system development, positive regulation of cytosolic calcium ion concentration, heart development, camera-type eye development, regulation of ion transmembrane transport, calcium ion transmembrane transport, regulation of heart rate by cardiac conduction…
	CCDC172	ABLIM1	CCDC172-ABLIM1	unknown	actin binding, metal ion binding	unknown	cytoskeleton organization, cilium assembly, lamellipodium assembly
DHSA-0803	COPS5	NCOA2	COPS5-NCOA2	thiol-dependent ubiquitin-specific protease activity, macrophage migration inhibitory factor binding, metallopeptidase activity, enzyme binding	ligand-dependent nuclear receptor binding, protein domain specific binding, RNA polymerase II intronic transcription regulatory region sequence-specific DNA binding, aryl hydrocarbon receptor binding, RNA polymerase II proximal promoter sequence-specific DNA binding, ligand-dependent nuclear receptor transcription coactivator activity, protein dimerization activity, chromatin binding, thyroid hor…	protein deubiquitination, regulation of IRE1-mediated unfolded protein response, negative regulation of apoptotic process, protein deneddylation, exosomal secretion, regulation of cell cycle, positive regulation of transcription from RNA polymerase II promoter, positive regulation of DNA binding transcription factor activity, regulation of JNK cascade	negative regulation of transcription from RNA polymerase II promoter, circadian regulation of gene expression, regulation of glucose metabolic process, transcription, DNA-templated, locomotor rhythm, regulation of transcription, DNA-templated, cellular response to hormone stimulus, cellular response to Thyroglobulin triiodothyronine, positive regulation of transcription from RNA polymerase II pro…
DHSA-0805	MSN	LUC7L2	MSN-LUC7L2	protein kinase binding, actin binding, double-stranded RNA binding, cell adhesion molecule binding, receptor binding	mRNA binding	regulation of cell shape, positive regulation of cellular protein catabolic process, regulation of cell size, gland morphogenesis, membrane to membrane docking, establishment of endothelial barrier, immunological synapse formation, positive regulation of protein localization to early endosome, cellular response to testosterone stimulus, positive regulation of gene expression, T cell proliferation…	mRNA splice site selection
DHSA-1113	RANBP3L	ARL15	RANBP3L-ARL15	NAD+ kinase activity, ATP binding, protein homodimerization activity, SMAD binding, GTPase activator activity, Ran GTPase binding	GTP binding	spindle organization, RNA export from nucleus, protein import into nucleus, intracellular transport, G1/S transition of mitotic cell cycle, NAD metabolic process, phosphorylation, positive regulation of mitotic centrosome separation, positive regulation of GTPase activity, NADP biosynthetic process, ubiquitin-dependent protein catabolic process	small GTPase mediated signal transduction

## Sheet: S6
Supplementary Table S6. Detection of fusion genes in canine HSAs by RT-PCR
Sample ID	Disease	MYO16-PTK2		AKT3-XPNPEP1		AP4E1-BAIAP2		PTPRB-NOL10
		RNA-seq	PCR	RNA-seq	PCR	RNA-seq	PCR	RNA-seq	PCR
DHSA-1006	HSA	neg	neg	neg	neg	neg	neg	neg	neg
DHSA-1011	HSA	neg	neg	neg	neg	neg	neg	neg	neg
DHSA-1013	HSA	neg	neg	neg	neg	neg	neg	neg	neg
DHSA-1014	HSA	neg	neg	neg	neg	neg	neg	neg	neg
DHSA-1015	HSA	neg	neg	neg	neg	neg	neg	neg	neg
DHSA-1017	HSA	neg	neg	neg	neg	neg	neg	neg	neg
DHSA-1106	HSA	neg	neg	neg	neg	neg	neg	neg	neg
DHSA-0906	HSA	pos	pos	neg	neg	neg	neg	neg	neg
DHSA-0908	HSA	neg	neg	neg	neg	neg	neg	neg	neg
DHSA-0910	HSA	neg	neg	neg	neg	neg	neg	neg	neg
DHSA-1113	HSA	neg	neg	neg	neg	neg	neg	neg	neg
DHSA-1007	HSA	neg	neg	neg	neg	neg	neg	neg	neg
DHSA-1010	HSA	neg	neg	neg	neg	neg	neg	neg	neg
DHSA-0903	HSA	neg	neg	neg	neg	neg	neg	neg	neg
DHSA-0909	HSA	neg	neg	neg	neg	neg	neg	neg	neg
DHSA-1107	HSA	neg	neg	neg	neg	neg	neg	neg	neg
DHSA-1108	HSA	neg	neg	neg	neg	neg	neg	neg	neg
DHSA-1109	HSA	neg	neg	neg	neg	neg	neg	neg	neg
DHSA-1110	HSA	neg	neg	neg	neg	neg	neg	neg	neg
DHSA-1111	HSA	neg	neg	neg	neg	neg	neg	neg	neg
CHAD-G4	HSA	neg	neg	neg	neg	neg	neg	neg	neg
CHAD-G6	HSA	neg	neg	neg	neg	neg	neg	neg	neg
CHAD-G3	HSA	neg	neg	neg	neg	neg	neg	neg	neg
DHSA-0804	HSA	neg	neg	neg	neg	neg	neg	neg	neg
DHSA-0805	HSA	neg	neg	neg	neg	neg	neg	neg	neg
DHSA-0702	HSA	neg	neg	neg	neg	neg	neg	neg	neg
DHSA-0701	HSA	neg	neg	neg	neg	neg	neg	neg	neg
DHSA-0605	HSA	neg	neg	neg	neg	neg	neg	neg	neg
DHSA-0601	HSA	neg	neg	neg	neg	neg	neg	neg	neg
DHSA-0606	HSA	neg	neg	neg	neg	neg	neg	neg	neg
DHSA-0602	HSA	neg	neg	neg	neg	neg	neg	neg	neg
DHSA-0907	HSA	neg	neg	neg	neg	neg	neg	neg	neg
DHSA-1114	HSA	neg	neg	neg	neg	neg	neg	neg	neg
DHSA-1202	HSA	neg	neg	neg	neg	neg	neg	neg	neg
DHSA-1203	HSA	neg	neg	neg	neg	neg	neg	neg	neg
DHSA-1112	HSA	neg	neg	neg	neg	neg	neg	neg	neg
DHSA-1008	HSA	neg	neg	neg	neg	neg	neg	neg	neg
CHAD-G8	HSA	neg	neg	neg	neg	neg	neg	neg	neg
DHSA-1519	HSA	neg	neg	neg	neg	neg	neg	neg	neg
DHSA-1512	HSA	neg	neg	neg	neg	neg	neg	neg	neg
DHSA-1513	HSA	neg	neg	pos	pos	neg	neg	neg	neg
DHSA-1426	HSA	neg	neg	neg	neg	neg	neg	neg	neg
DHSA-1503	HSA	neg	neg	neg	neg	neg	neg	neg	neg
DHSA-1504	HSA	neg	neg	neg	neg	neg	neg	neg	neg
DHSA-1434	HSA	neg	neg	neg	neg	neg	neg	neg	neg
DHSA-1423	HSA	neg	neg	neg	neg	neg	neg	neg	neg
DHSA-1415	HSA	neg	neg	neg	neg	neg	neg	neg	neg
DHSA-1409	HSA	neg	neg	neg	neg	neg	neg	neg	neg
DHSA-1408	HSA	neg	neg	neg	neg	neg	neg	neg	neg
DHSA-1407	HSA	neg	neg	neg	neg	neg	neg	neg	neg
DHSA-1306	HSA	neg	neg	neg	neg	neg	neg	neg	neg
DHSA-1204	HSA	neg	neg	neg	neg	pos	pos	pos	pos
DHSA-1416	HSA	neg	neg	neg	neg	neg	neg	neg	neg
DHSA-1115	Hematoma	neg	neg	neg	neg	neg	neg	neg	neg
DHSA-1501	Hematoma	neg	neg	neg	neg	neg	neg	neg	neg
DHSA-0806	Hematoma	neg	neg	neg	neg	neg	neg	neg	neg
DHSA-1432	Hematoma	neg	neg	neg	neg	neg	neg	neg	neg
DHSA-1430	Hematoma	neg	neg	neg	neg	neg	neg	neg	neg
DHSA-1421	Hematoma	neg	neg	neg	neg	neg	neg	neg	neg
DHSA-1419	Hematoma	neg	neg	neg	neg	neg	neg	neg	neg
DHSA-1417	Hematoma	neg	neg	neg	neg	neg	neg	neg	neg
DHSA-1411	Hematoma	neg	neg	neg	neg	neg	neg	neg	neg
DHSA-1405	Hematoma	neg	neg	neg	neg	neg	neg	neg	neg
neg = Negative
pos = Positive

## Sheet: S7
Supplementary Table S7. Biological functions associated with 490 upregulated genes in human angiosarcomas
Categories	Diseases or Functions Annotation	p-value	Predicted Activation State	Activation z-score	# Molecules
Cancer,Organismal Injury and Abnormalities	Non-melanoma solid tumor	7.12e-29	Increased	2.328	469
Cancer,Organismal Injury and Abnormalities	Nonhematologic malignant neoplasm	1.25e-28	Increased	2.479	470
Cancer,Organismal Injury and Abnormalities	Carcinoma	1.96e-27	Increased	2.371	465
Cancer,Organismal Injury and Abnormalities	Malignant solid tumor	2.5e-26	Increased	2.87	472
Cancer,Organismal Injury and Abnormalities	Cancer of secretory structure	1.97e-20	Increased	2.607	408
Cellular Movement	Cell movement	8.62e-18	Increased	3.853	154
Cancer,Organismal Injury and Abnormalities	Malignant genitourinary solid tumor	1.23e-17	Increased	2.157	335
Cellular Movement	Migration of cells	9.9e-17	Increased	3.587	140
Cancer,Organismal Injury and Abnormalities	Breast or colorectal cancer	4.88e-16	Increased	2.178	283
Cellular Development,Cellular Growth and Proliferation	Cell proliferation of tumor cell lines	2.42e-15	Increased	3.649	120
Cardiovascular System Development and Function	Development of vasculature	1.6e-12	Increased	2.771	82
Cellular Assembly and Organization,Cellular Function and Maintenance	Organization of cytoskeleton	1.15e-11	Increased	2.02	96
Cardiovascular System Development and Function,Organismal Development	Angiogenesis	4.14e-11	Increased	2.771	72
Cancer,Organismal Injury and Abnormalities	Growth of tumor	1.58e-10	Increased	2.633	67
Cardiovascular System Development and Function,Organismal Development	Vasculogenesis	2.26e-10	Increased	2.445	61
Cellular Assembly and Organization,Cellular Function and Maintenance	Organization of cytoplasm	5.52e-10	Increased	2.118	98
Cardiovascular System Development and Function,Cellular Movement	Migration of endothelial cells	7.86e-10	Increased	2.186	35
Cardiovascular System Development and Function,Cellular Movement	Cell movement of endothelial cells	2.16e-09	Increased	2.13	36
Cellular Movement	Cell movement of tumor cell lines	9.65e-09	Increased	4.142	68
Cellular Movement	Invasion of cells	1.14e-08	Increased	3.648	67
Cellular Movement	Migration of tumor cell lines	2.07e-08	Increased	4.069	59
Cell Death and Survival	Cell survival	1.81e-07	Increased	5.177	87
Cell Cycle,Cellular Assembly and Organization,DNA Replication, Recombination, and Repair	Segregation of chromosomes	2.04e-07	Increased	2.01	16
Embryonic Development,Organismal Development	Development of body axis	2.3e-07	Increased	2.62	68
Cell Death and Survival	Cell viability	4.94e-07	Increased	4.705	82
Cellular Movement	Invasion of tumor cell lines	5e-07	Increased	4.475	53
Cell-To-Cell Signaling and Interaction	Interaction of tumor cell lines	6.69e-07	Increased	2.278	33
Cancer,Organismal Injury and Abnormalities	Growth of malignant tumor	1e-06	Increased	2.763	34
Embryonic Development,Organismal Development	Development of head	1.86e-06	Increased	2.62	62
Cell-To-Cell Signaling and Interaction	Binding of tumor cell lines	2.59e-06	Increased	2.027	31
Cellular Movement,Embryonic Development	Cell movement of embryonic cells	4.19e-06	Increased	2.154	14
Cellular Movement	Cell movement of melanoma cell lines	4.99e-06	Increased	2.201	15
Cell Cycle	Cell cycle progression	5.44e-06	Increased	2.676	62
Cellular Movement	Migration of melanoma cell lines	1.03e-05	Increased	2.707	13
Cellular Development,Cellular Growth and Proliferation	Cell proliferation of breast cancer cell lines	1.84e-05	Increased	2.308	34
Cellular Movement,Immune Cell Trafficking	Leukocyte migration	2.52e-05	Increased	2.264	56
Cellular Assembly and Organization,Tissue Development	Formation of filaments	2.83e-05	Increased	3.327	30
Cell Morphology,Cellular Assembly and Organization,Cellular Function and Maintenance	Formation of cellular protrusions	3.61e-05	Increased	2.599	54
Cellular Assembly and Organization,Tissue Development	Fibrogenesis	4.17e-05	Increased	3.255	32
Cellular Movement	Homing of cells	4.22e-05	Increased	2.925	37
Cellular Growth and Proliferation,Connective Tissue Development and Function,Tissue Development	Proliferation of connective tissue cells	4.41e-05	Increased	2.775	38
Cellular Movement	Cell movement of breast cancer cell lines	4.81e-05	Increased	2.033	25
Cellular Movement	Chemotaxis	6.66e-05	Increased	2.679	35
Cellular Development,Cellular Growth and Proliferation	Cell proliferation of carcinoma cell lines	6.88e-05	Increased	2.366	30
Connective Tissue Development and Function,Tissue Development	Growth of connective tissue	7.32e-05	Increased	2.302	40
Cellular Growth and Proliferation	Outgrowth of cells	7.88e-05	Increased	3.123	29
Tissue Morphology	Remodeling of blood vessel	8.42e-05	Increased	2.236	9
Cancer,Organismal Injury and Abnormalities,Tumor Morphology	Invasion of tumor	8.65e-05	Increased	2.231	18
Cellular Development,Cellular Growth and Proliferation,Nervous System Development and Function,Tissue Development	Development of neurons	0.000108	Increased	2.535	47
Cellular Movement,Hematological System Development and Function,Immune Cell Trafficking	Cell movement of leukocytes	0.00012	Increased	2.527	46
Cancer,Organismal Injury and Abnormalities,Tumor Morphology	Invasion of malignant tumor	0.000126	Increased	2.157	13
Cancer,Organismal Injury and Abnormalities	Growth of carcinoma	0.000134	Increased	2.035	13
Cellular Movement,Hematological System Development and Function,Immune Cell Trafficking,Inflammatory Response	Cell movement of phagocytes	0.00017	Increased	2.812	35
Cardiovascular System Development and Function	Vascularization	0.000176	Increased	2.174	18
Cell-To-Cell Signaling and Interaction,Cellular Assembly and Organization	Cell-cell contact	0.000187	Increased	2.264	38
Cellular Movement	Migration of breast cancer cell lines	0.000187	Increased	2.181	21
Cell Death and Survival	Cell viability of tumor cell lines	0.000202	Increased	4.039	51
Cancer,Cellular Development,Cellular Growth and Proliferation,Organismal Injury and Abnormalities,Tumor Morphology	Proliferation of cancer cells	0.000209	Increased	2.23	24
Cellular Assembly and Organization	Formation of cytoskeleton	0.000255	Increased	2.513	26
Cellular Development	Differentiation of nervous system	0.00029	Increased	2.399	31
Cellular Development,Cellular Growth and Proliferation,Connective Tissue Development and Function	Proliferation of fibroblast cell lines	0.000314	Increased	2.59	27
Cellular Movement	Cell movement of neurons	0.000434	Increased	2.01	18
Post-Translational Modification	Phosphorylation of protein	0.000441	Increased	2.951	38
Cell-To-Cell Signaling and Interaction	Activation of cells	0.000446	Increased	2.797	52
Cellular Movement,Hematological System Development and Function,Immune Cell Trafficking,Inflammatory Response	Chemotaxis of phagocytes	0.000477	Increased	2.794	20
Organismal Survival	Organismal death	1.77e-10	Decreased	-9.86	138
Organismal Survival	Morbidity or mortality	2.19e-10	Decreased	-9.732	139
Cell Death and Survival	Necrosis	3.79e-10	Decreased	-2.374	147
Gastrointestinal Disease,Hepatic System Disease,Organismal Injury and Abnormalities	Liver lesion	2.59e-08	Decreased	-2.168	233
Cell Death and Survival	Cell death of tumor cell lines	3.85e-08	Decreased	-2.003	94
Organismal Injury and Abnormalities	Bleeding	3.03e-07	Decreased	-2.578	35
Organismal Injury and Abnormalities	Edema	6.44e-07	Decreased	-3.621	31
Respiratory Disease	Respiratory failure	8.77e-06	Decreased	-2.813	15
Cardiovascular Disease,Developmental Disorder,Hereditary Disorder,Organismal Injury and Abnormalities,Respiratory Disease	Persistent truncus arteriosus	9.15e-06	Decreased	-2.611	7
Developmental Disorder	Midline defect	1.47e-05	Decreased	-3.81	22
Organismal Injury and Abnormalities	Intracranial hemorrhage	3.76e-05	Decreased	-2.236	14
Cardiovascular Disease,Developmental Disorder,Organismal Injury and Abnormalities	Ventricular septal defect	6.16e-05	Decreased	-2.861	12
Organismal Survival	Perinatal death	0.000129	Decreased	-5.823	35
Cardiovascular Disease,Hereditary Disorder,Organismal Injury and Abnormalities	Familial vascular disease	0.000176	Decreased	-2.608	18
Cardiovascular Disease,Hereditary Disorder,Organismal Injury and Abnormalities	Familial cardiovascular disease	0.000182	Decreased	-2.426	30
Cardiovascular Disease,Developmental Disorder,Organismal Injury and Abnormalities	Conotruncal heart malformations	0.000334	Decreased	-2.608	8
Cardiovascular Disease,Developmental Disorder,Hereditary Disorder,Organismal Injury and Abnormalities	Familial congenital heart disease	0.000449	Decreased	-2.426	12
© 2000-2020 QIAGEN. All rights reserved.

## Sheet: S8
Supplementary Table S8. Association of frequency between fusion genes, TP53 and PIK3CA mutations
	PIK3CAmt (n = 16)	PIK3CAwt (n = 58)	Contingency table analysis
TP53mt (n = 24)	10	14	P = 0.004†
TP53wt (n = 50)	6	44
	Fusion+ (N=11)	Fusion- (N=63)
TP53mt (n = 24)	8	16	P = 0.004§
TP53wt (n = 50)	3	47
TP53mt/PIK3CAmt, TP53mt/PIK3CAwt, or TP53wt/PIK3CAmt (n = 30)	9	21	P = 0.005§
TP53wt/PIK3CAwt (n = 44)	2	42
PIK3CAmt (n = 16)	5	11	P = 0.037†
PIK3CAwt (n = 58)	6	52
TP53wt/PIK3CAmt (n = 6)	1	5	P = 0.324§
TP53wt/PIK3CAwt (n = 44)	2	42
TP53mt/PIK3CAmt (n = 10)	4	6	P = 0.013†
TP53mt/PIK3CAwt (n = 14)	4	10
TP53wt/PIK3CAmt (n = 6)	1	5
TP53wt/PIK3CAwt (n = 44)	2	42
†Chi-square test; §Fisher's exact test

## Sheet: S9
Supplementary Table S9. Association of fusion genes with dog signalment and tumor histology
		Fusion (N=11)	No Fusion (N=63)	Contingency table analysis
Age	>= Median (n = 38)	4	34	P = 0.34§
	< M (n = 36)	7	29
Breed	GR (n = 43)	6	37	P = 0.80†
	Non-GR (n = 31)	5	26
Sex	F (n = 38)	5	33	P = 0.67†
	M (n = 36)	6	30
Neutered	Neutered (n = 53)	7	46	P = 0.21§
	Intact (n = 13)	4	9
Affected organ	Spleen (n = 46)	5	41	P = 0.11†
	Liver (n = 9)	1	8
	Heart (n = 15)	5	10
Histological subtype	Capillary (n = 18)	4	14	P = 0.64†
	Cavernous (n = 23)	2	21
	Solid (n = 8)	1	7
	Mixed (n = 21)	4	17
†Chi-square test; §Fisher's exact test

## Sheet: S10
Supplementary Table S10. Association of frequency between fusion genes, TP53 and PIK3CA mutations
	Group initial*	Number of DEGs	Upregulation	Downregulation	Summary of pathway analysis
TP53mt/Fusion+/PIK3CAwt (n = 4) vs TP53mt/Fusion-/PIK3CAwt (n = 9)	PF vs P	41	40	1	In PF group, 40 of 41 DEGs (97.6%) are upregulated. Those are associated with WNT3A upstream regulator and PI3K and VEGF signaling involving AKT, ERK, and TNN.
TP53mt/Fusion+/PIK3CAwt (n = 4) vs TP53mt/Fusion-/PIK3CAmt (n = 6)	PF vs PK	212	203	9	In PF group, 203 of 212 DEGs (95.8%) genes are upregulated. Genes associated with immune regulation are positively enriched.
TP53mt/Fusion+/PIK3CAwt (n = 4) vs TP53mt/Fusion+/PIK3CAmt (n = 4)	PF vs PFK	377	348	29	In PF group, 348 of 377 DEGs (92.3%) genes are upregulated. Genes enrichment is associated with vascular and angiogenic function including activation of PDGF, PI3K signaling, and P53 pathway. Immunoregulatory genes are enriched as well.
TP53mt/Fusion+/PIK3CAmt (n = 4) vs TP53mt/Fusion-/PIK3CAmt (n = 6)	PFK vs PK	40	2	38	In PFK group, 38 of 40 DEGs (95%) are downregulated. Inhibition of IL-6 and TP53 as upstream regulators is shown. Gene signaures are associated with immune downregulation and inhibition of PI3K signaling in PFK group compared to PK.
TP53mt/Fusion-/PIK3CAmt (n = 6) vs TP53wt/Fusion-/PIK3CAmt (n = 4)	PK vs K	269	42	227	In PK group, 227 of 269 DEGs (84.4%) are downregulated. Genes associated with chromatin regulation and immunoregulation are negatively enriched: MAPK1 kinase activation; SOCS1 activation; SMARCA4 inhibition.
TP53mt/Fusion-/PIK3CAmt (n = 6) vs TP53mt/Fusion-/PIK3CAwt (n = 9)	PK vs P	224	54	170	In PK group, 170 of 224 DEGs (75.9%) are downregulated. SMARCA4 inhibition is the top upstream regulator for the gene regulation. Gene enrichment is associated with immunosuppression.
TP53mt/Fusion-/PIK3CAwt (n = 9) vs TP53wt/Fusion-/PIK3CAmt (n = 4)	P vs K	19	5	14	Activation of IL10RA is the top upstream regulator in P compared to K group, which is associated with immunosuppression.
*P=TP53mt; F=Fusion+; K=PIK3CAmt
DEGs = differentially expressed genes
Note: PF group is highlighted in blue

[truncated: 5 more sheets: S11, S12, S13, S14, S15]
